# Supplementary material
Source: publisher figshare collection journal article supplement (https://acs.figshare.com/ndownloader/files/7933687)
Supplement: Supplementary file 1 [file 7933687]

## Supporting Information

### **Impact of conditioning prior to dilute acid deconstruction of biomass for the production of fermentable sugars**

Manali Kapoor, Shveta Soam, Surbhi Semwal, Ravi P. Gupta, Ravindra Kumar\* and Deepak K.

Tuli

DBT-IOC Centre for Advance Bioenergy Research, Research & Development Centre, Indian Oil Corporation Limited, Sector-13, Faridabad-121007

Total pages 3, figure 1

Figure S1 .....S2

---

\*Corresponding author: Tel.: 91-0129-2294463; Fax: 91-01292286221; E-mail address:

[kumarr3@indianoil.in](mailto:kumarr3@indianoil.in)

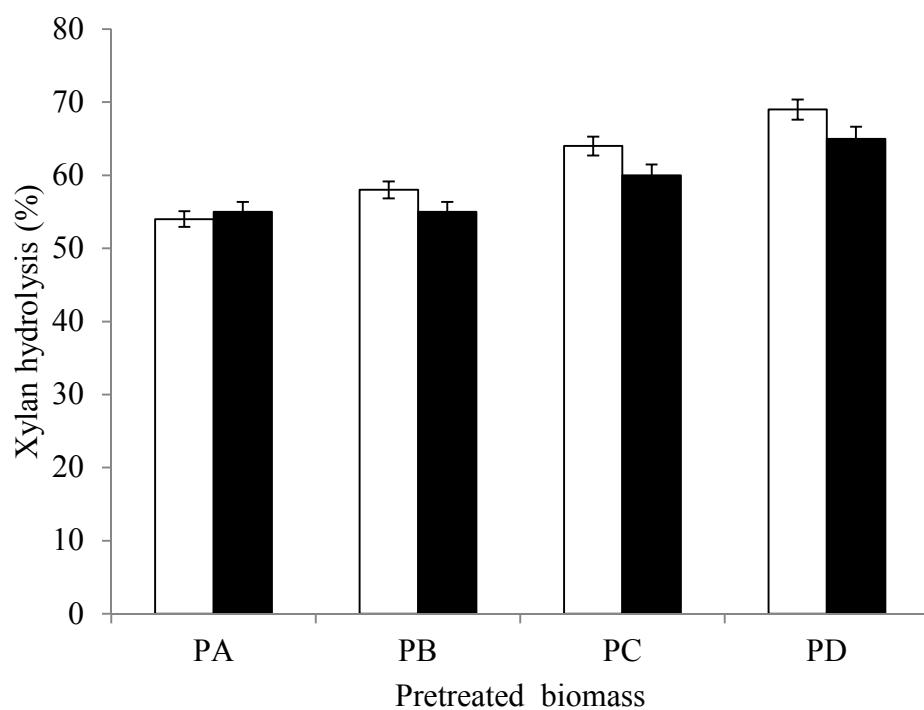

Figure S1: Xylan hydrolysis of unwashed pretreated RS obtained at different pretreatment experiments at 10 and 15 wt% WIS loading using 8FPU/g WIS of biomass. Xylan hydrolysis (E) (%) was calculated by using equation as given in reference<sup>[18]</sup>. □ 10 wt% WIS, ■ 15 wt% WIS.
